# Supplementary material for: Poly(3,4-ethylenedioxythiophene)/poly(bis(4-phenoxysulfonic acid)phosphazene) conductive composites: an alternative interfacial layer to PEDOT : PSS
Source: Royal Society of Chemistry journal article supplement (doi:10.1039/d4tc00109e), 2024-01-01
Supplement: d4tc00109e1.pdf [file d4tc00109e1.pdf]

## Supporting Information - Poly(3,4-ethylenedioxythiophene)/Poly(bis(4-phenoxy sulfonic acid)phosphazene) Conductive Composites: An Alternative Interfacial Layer to PEDOT:PSS

Elif Büşra Çelebi,<sup>a,b</sup> Joseph Cameron,<sup>b</sup> Peter J. Skabara,<sup>b</sup> Ferda Hacivelioglu<sup>a,b\*</sup>

<sup>a</sup>Gebze Technical University Department of Chemistry, 41400, Gebze, Kocaeli, TURKIYE.

<sup>b</sup>University of Glasgow, School of Chemistry, G12 8QQ, Glasgow, UK.

Corresponding authors: [ferda@gtu.edu.tr](mailto:ferda@gtu.edu.tr); [peter.skabara@glasgow.ac.uk](mailto:peter.skabara@glasgow.ac.uk)

### Current-Voltage-Luminance Graphs

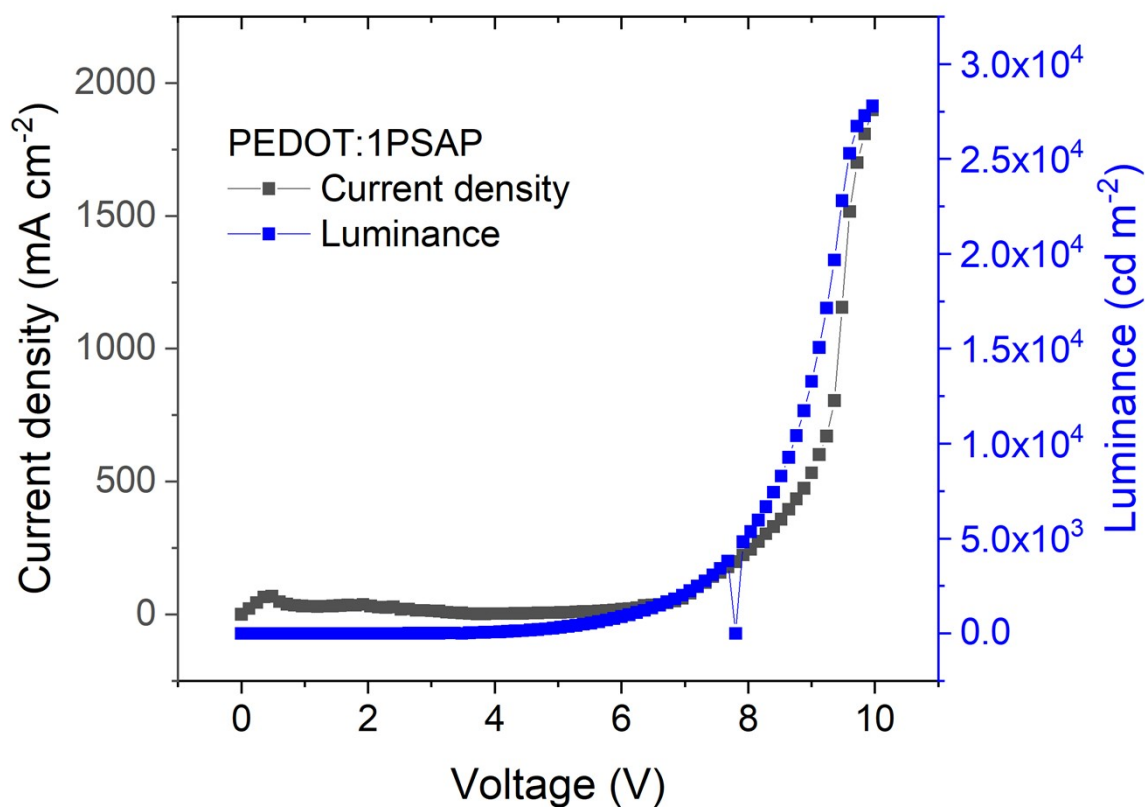

Fig. S1 Current-voltage-luminance plot for device ITO/PEDOT:1PSAP/Super Yellow/Ca/Al

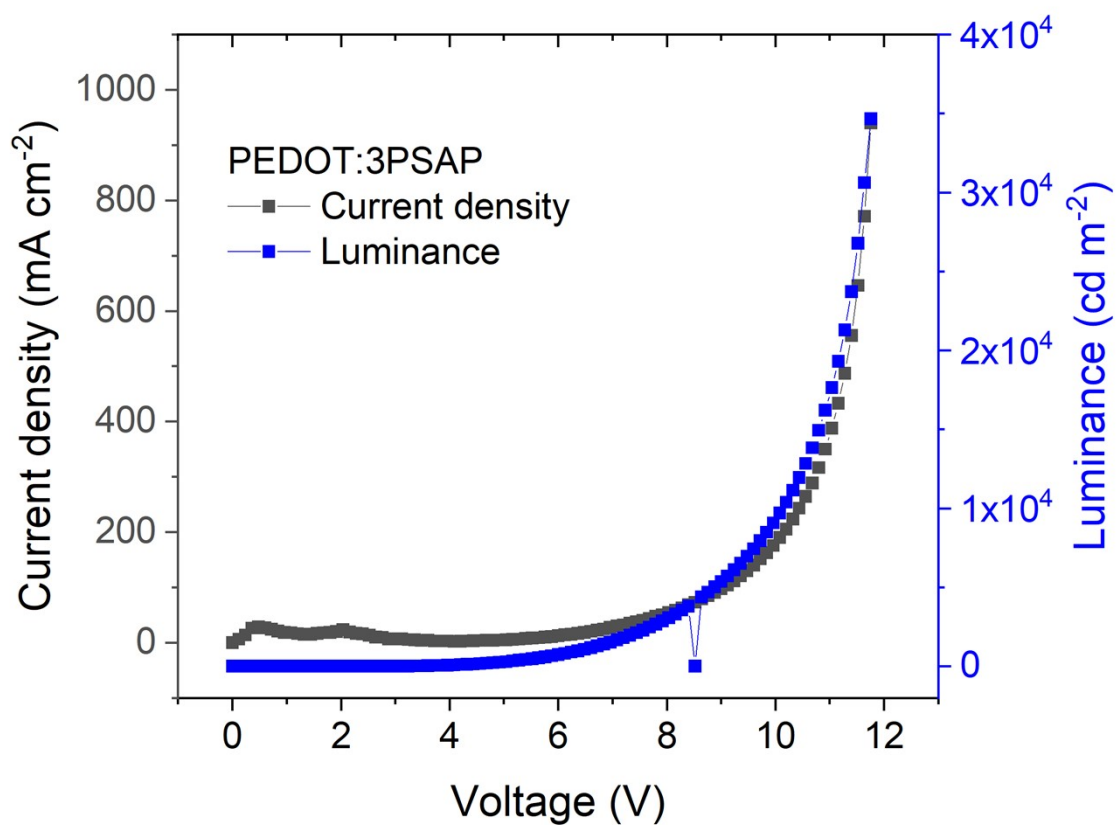

**Fig. S2** Current-voltage-luminance plot for device ITO/PEDOT:3PSAP/Super Yellow/Ca/Al

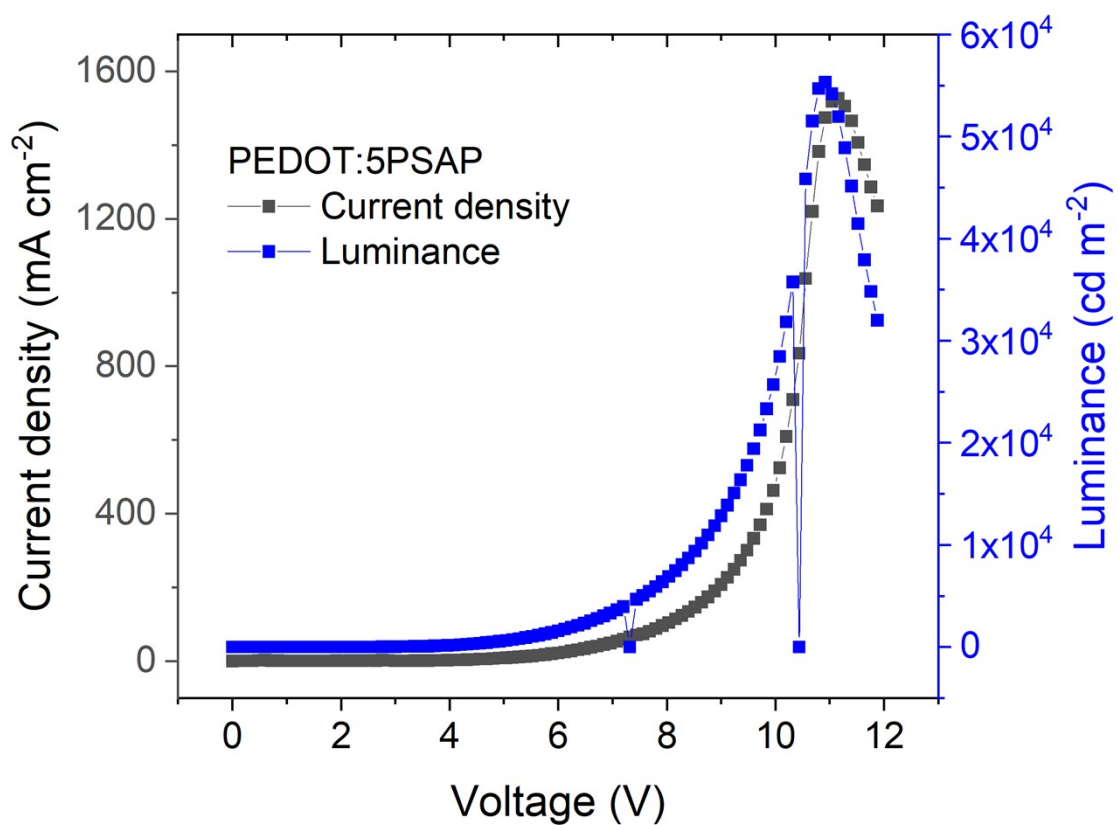

**Fig. S3** Current-voltage-luminance plot for device ITO/PEDOT:5PSAP/Super Yellow/Ca/Al

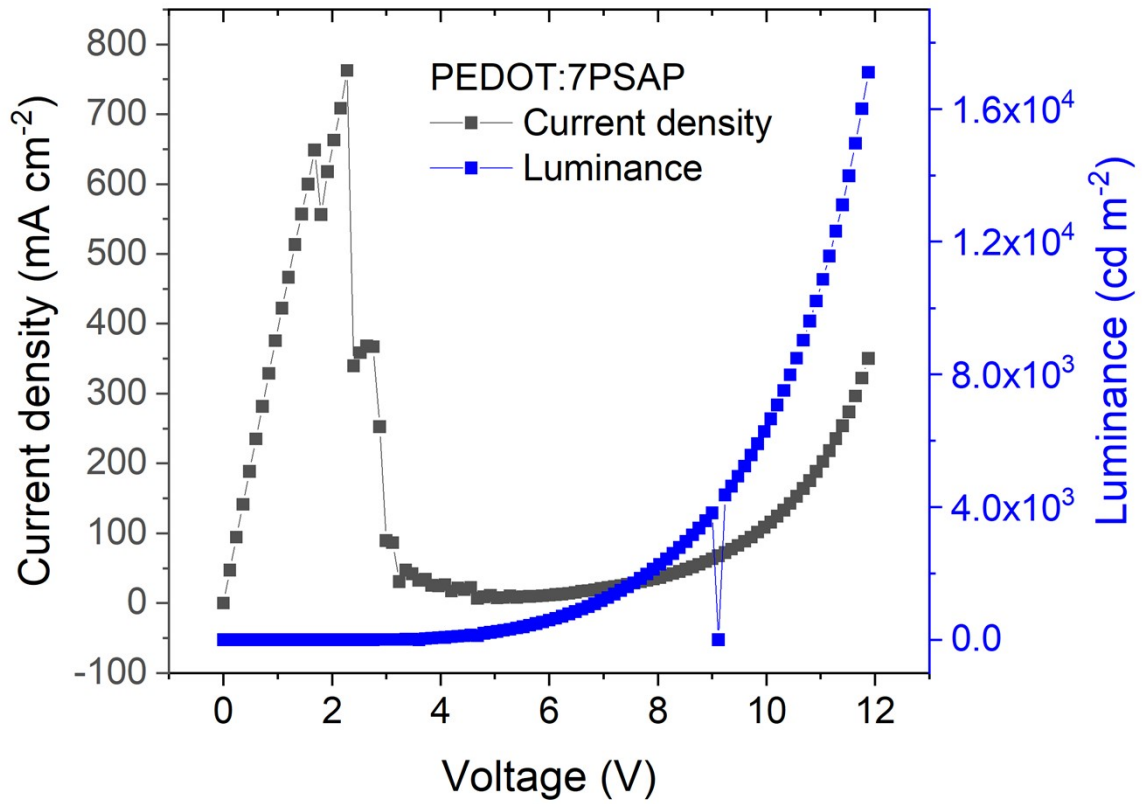

**Fig. S4** Current-voltage-luminance plot for device ITO/PEDOT:7PSAP/Super Yellow/Ca/Al

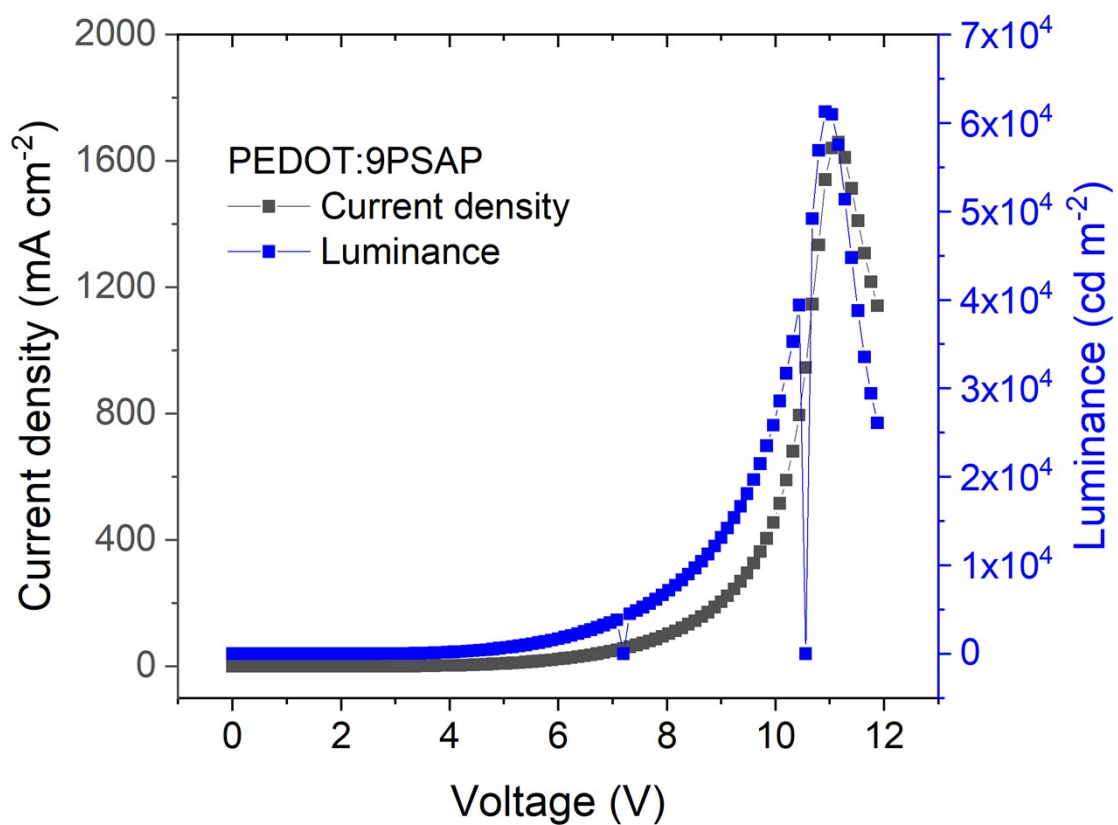

**Fig. S5** Current-voltage-luminance plot for device ITO/PEDOT:9PSAP/Super Yellow/Ca/Al

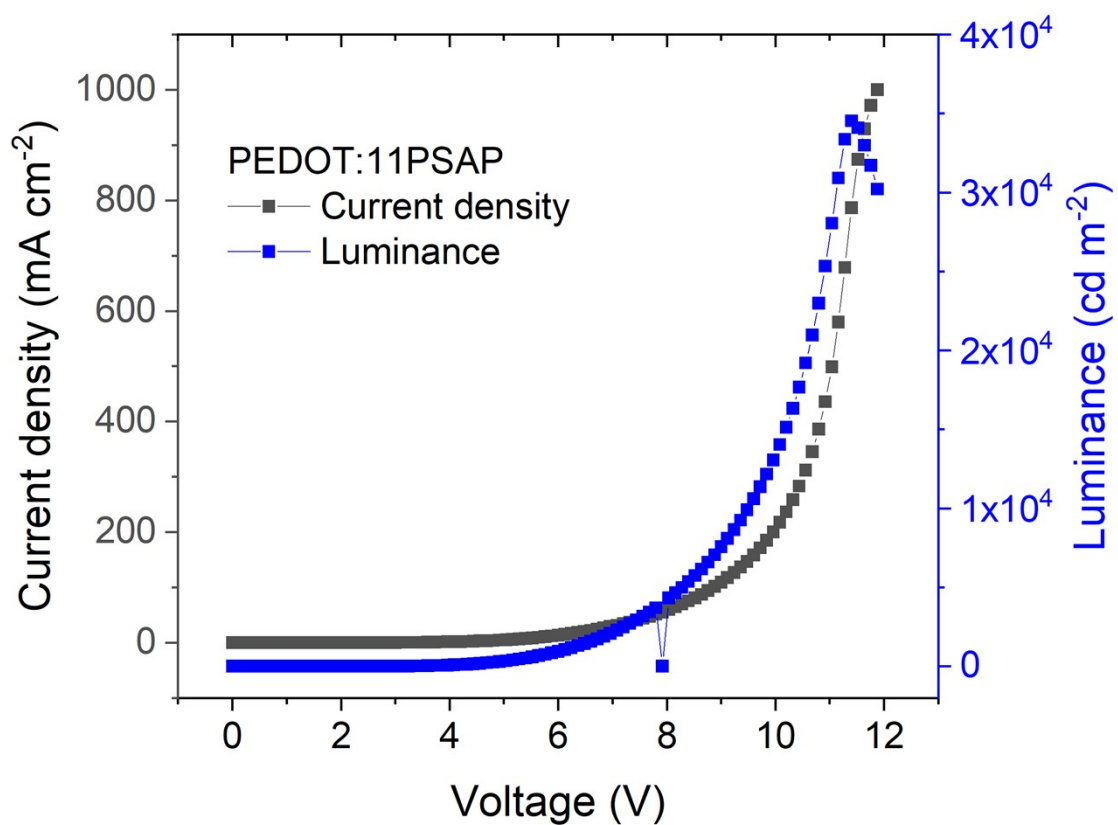

**Fig. S6** Current-voltage-luminance plot for device ITO/PEDOT:11PSAP/Super Yellow/Ca/Al

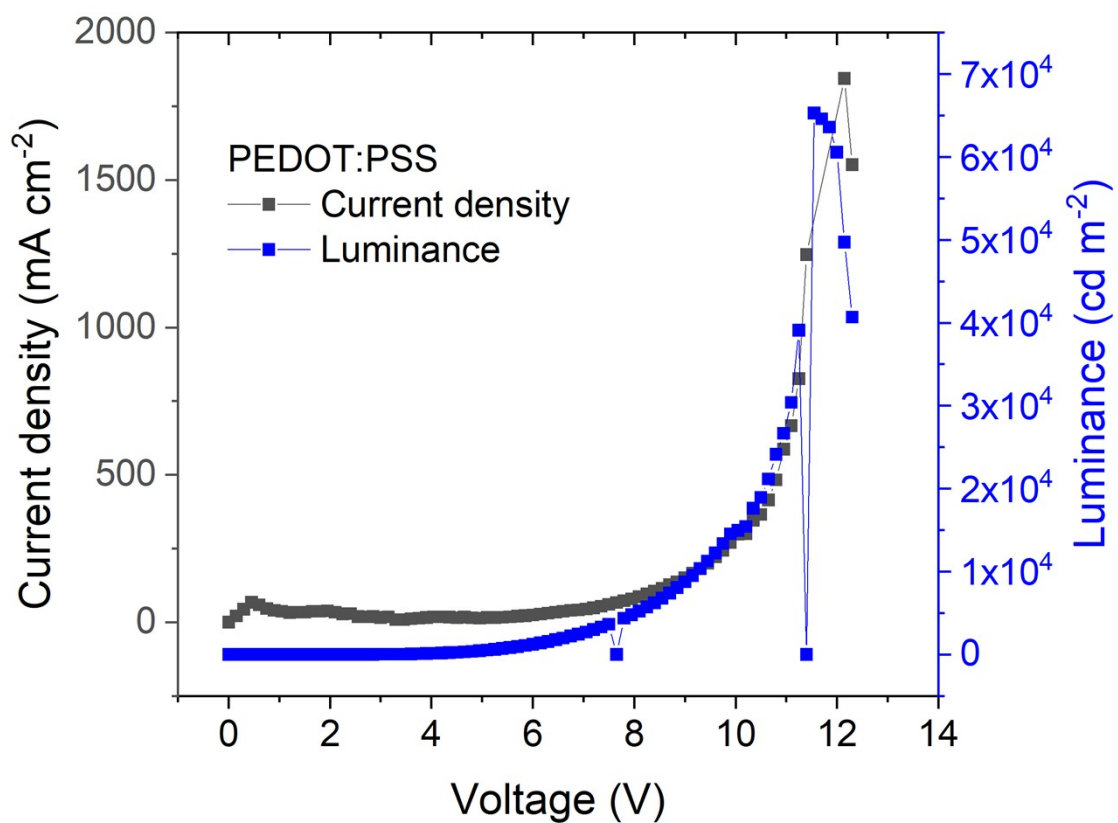

**Fig. S7** Current-voltage-luminance plot for device ITO/PEDOT:PSS (Al4083)/Super Yellow/Ca/Al
